# Supplementary material for: Nafion®-coated mesoporous Pd film toward remarkably enhanced detection of lactic acid
Source: Royal Society of Chemistry journal article supplement (doi:10.1039/c7ra13026k), 2018-01-01
Supplement: c7ra13026k1.pdf [file c7ra13026k1.pdf]

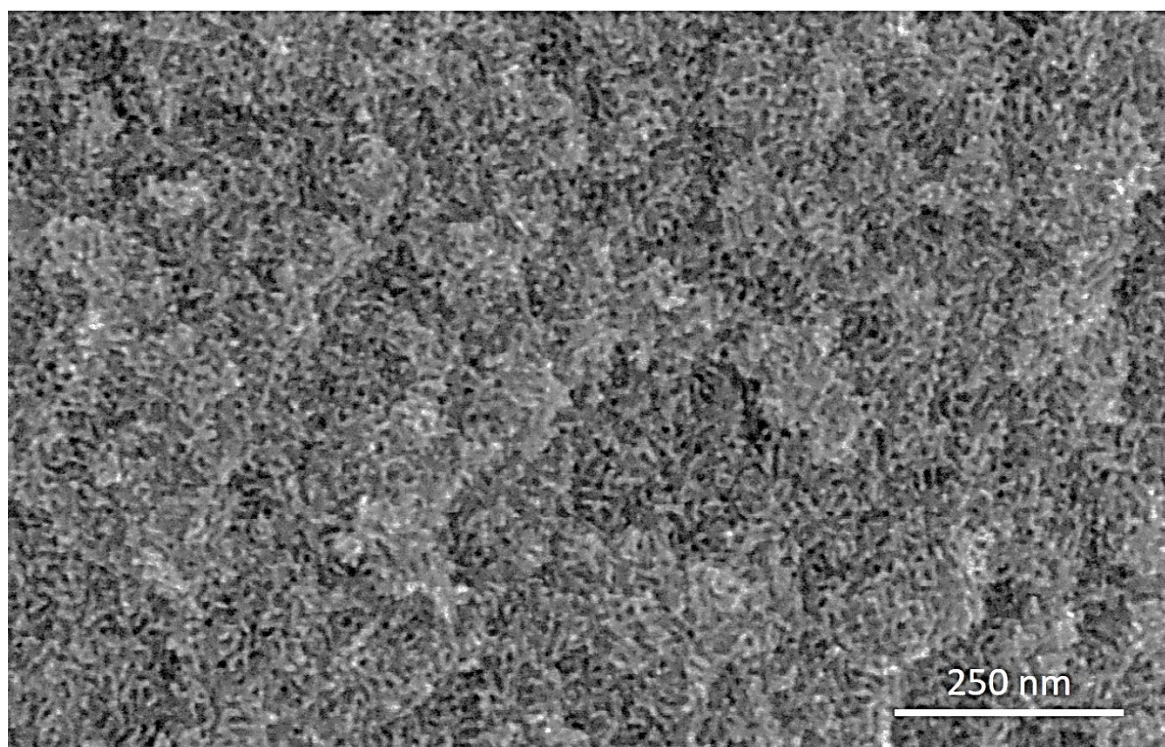

**Figure S1** High resolution cross-sectional SEM image of mesoporous Pd film.

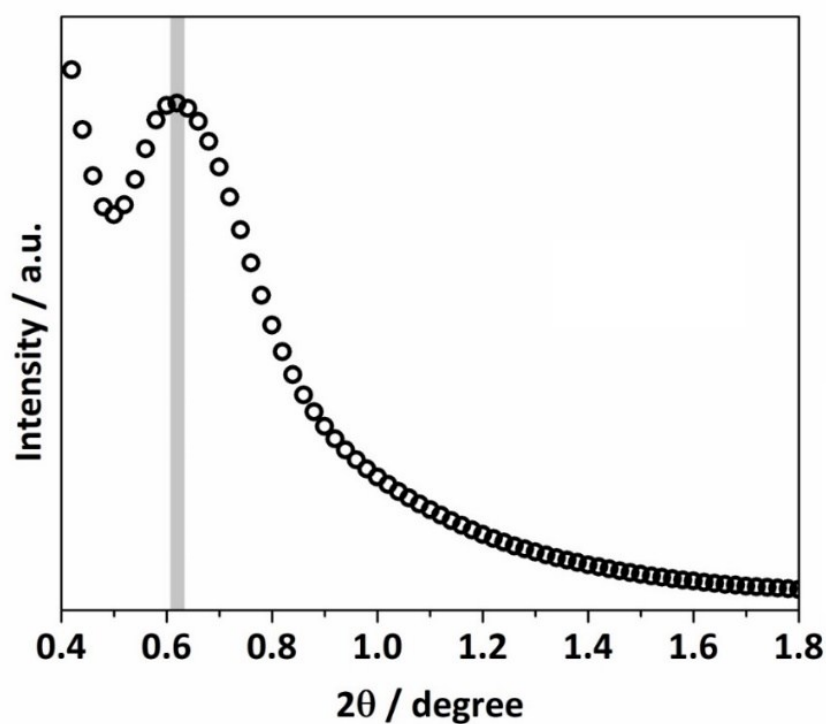

**Figure S2** Low-angle XRD of mesoporous Pd film

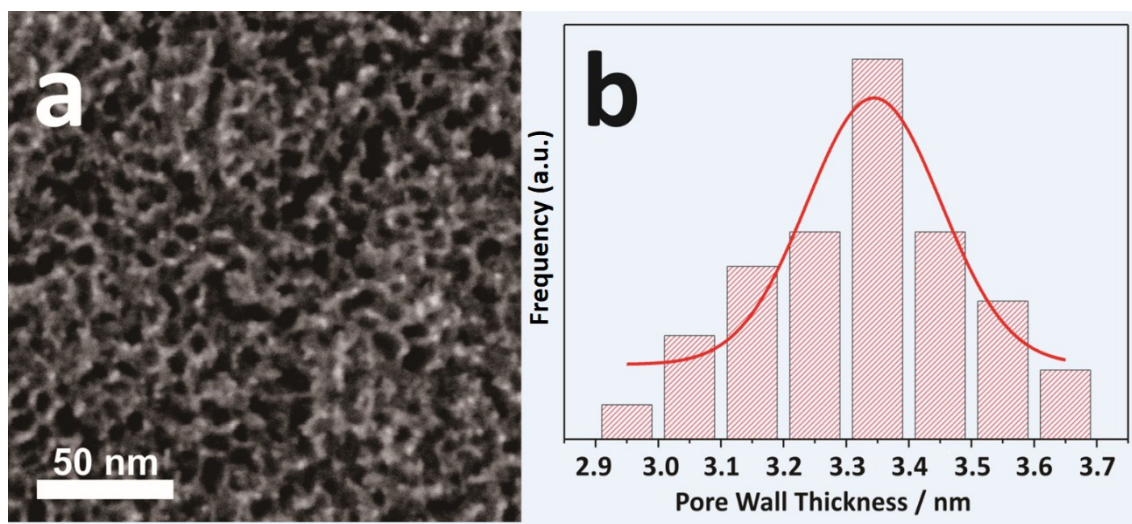

**Figure S3** (a) High resolution SEM image of mesoporous Pd film. (b) Size distribution of pore wall thickness of mesoporous Pd film.

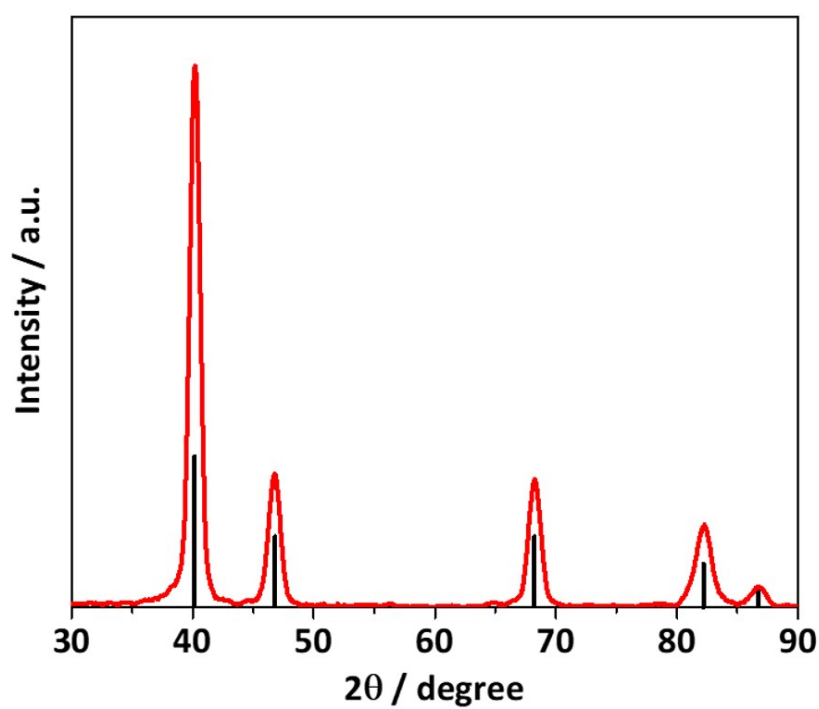

**Figure S4** Comparison between the XRD pattern of the mesoporous Pd film and the JCPDS #05-0681.

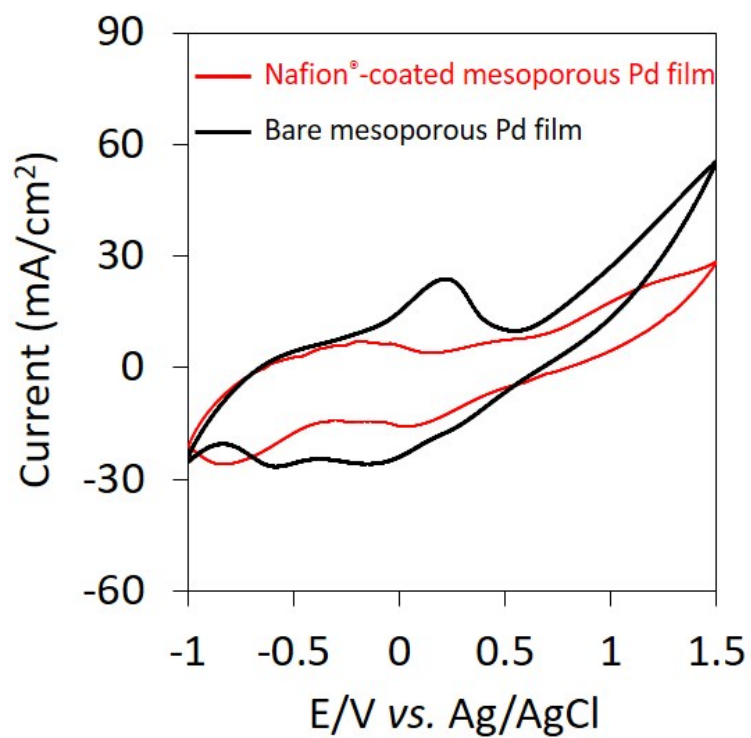

**Figure S5** CV curve for Nafion<sup>®</sup>-coated mesoporous Pd film and bare mesoporous Pd film measured in NaCl solution (0.4 %, pH=7). The currents are normalized by geometric electrode area.

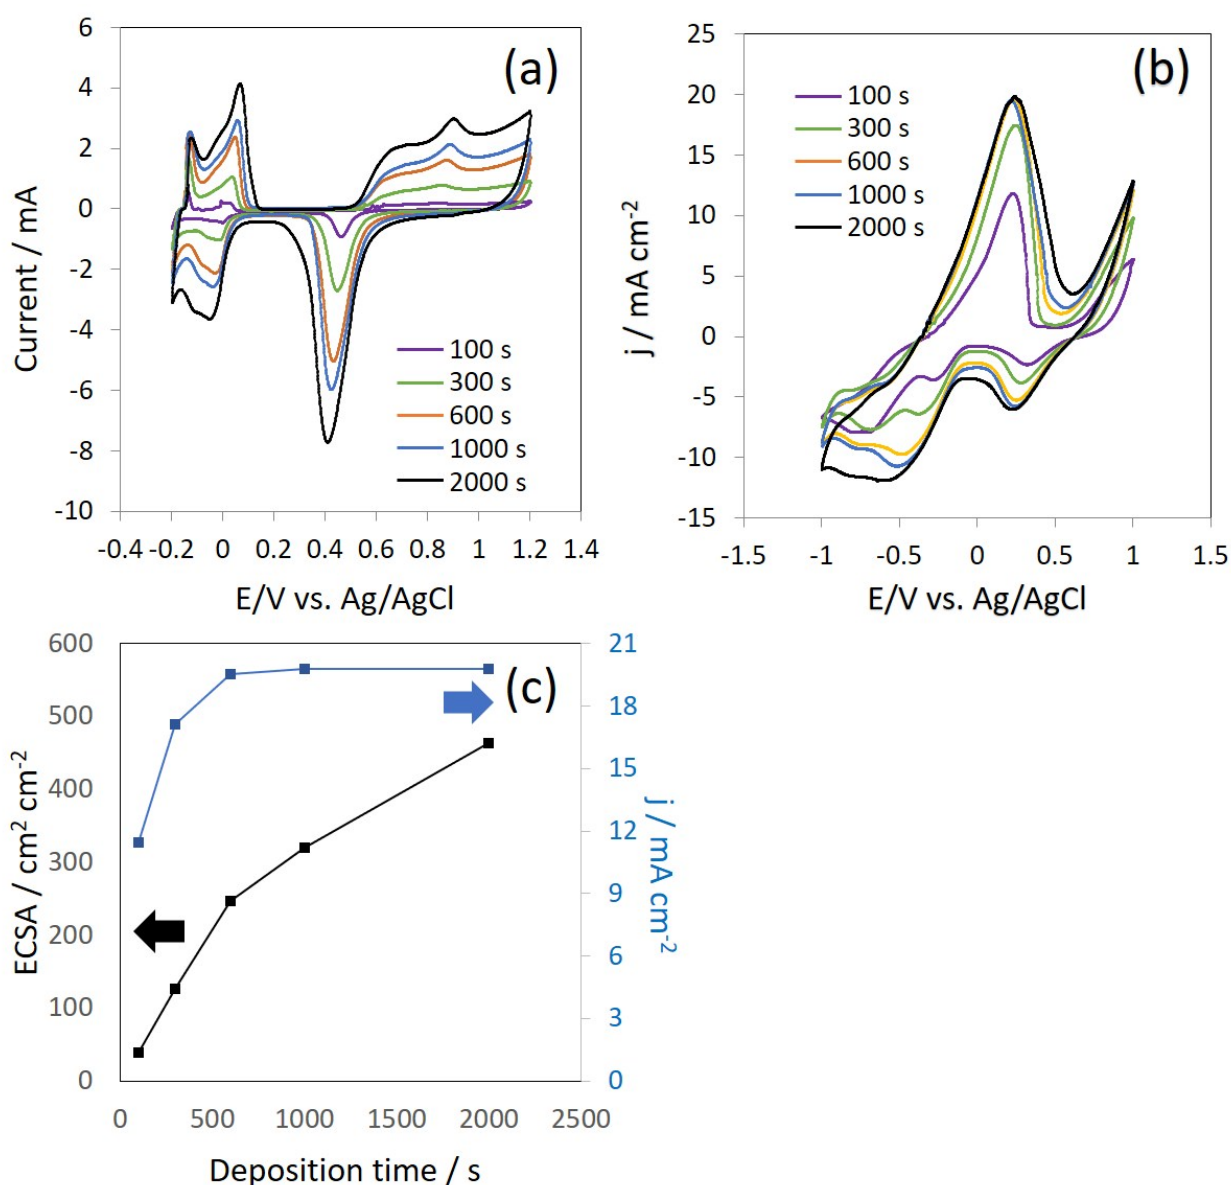

**Figure S6** (a) CV curves of the mesoporous Pd films prepared at various deposition times (*i.e.*, with various thicknesses) in 0.5 M H<sub>2</sub>SO<sub>4</sub>. (b) CV curves measured in 0.4% NaCl solution containing lactic acid (10 mM). (c) Relationship between the deposition times *vs.* the ECSAs and the deposition times *vs.* the anodic peak current densities by oxidation of lactic acid. All the CV curves were obtained at a scan rate of 20 mV s<sup>-1</sup>.

The currents are normalized by geometric electrode area.

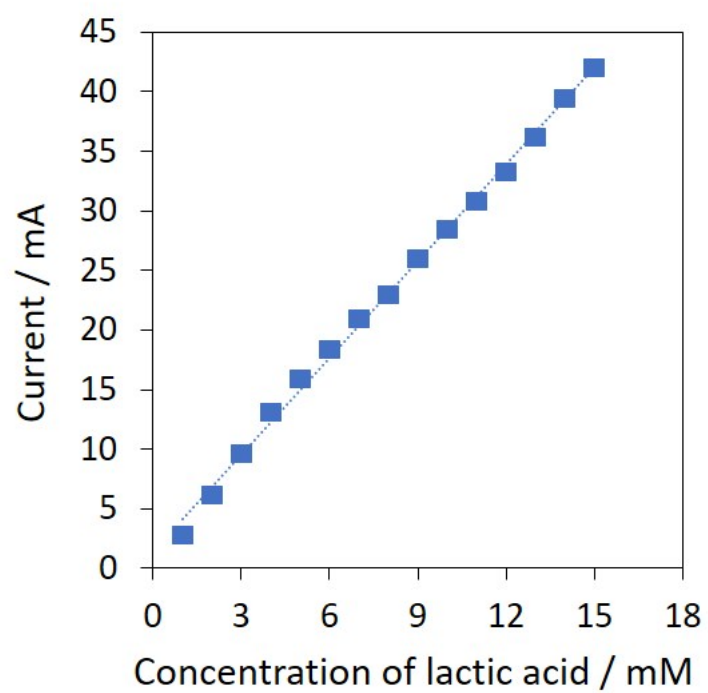

**Figure S7** Relationship between the amperometric response and lactic acid concentrations (up to 15 mM in total, *i.e.*, 15 times drops).
